# Supplementary material for: Identification of operational deflection shapes of a wind turbine gearbox using fiber-optic strain sensors on a serial production end-of-line test bench
Source: Copernicus journal article supplement (doi:10.5194/wes-10-207-2025), 2025-01-22
Supplement: Supplementary file 1 [file wes-10-207-2025-supplement.zip]

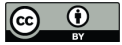

## *Supplement of*

# **Identification of operational deflection shapes of a wind turbine gearbox using fiber-optic strain sensors on a serial production end-of-line test bench**

**Unai Gutierrez Santiago et al.**

*Correspondence to:* Unai Gutierrez Santiago ([u.gutierrezsantiago@tudelft.nl](mailto:u.gutierrezsantiago@tudelft.nl))

- [wes-10-207-2025-supplement-title-page.pdf](#)
- [VideoS1\\_Fig13.avi](#)
- [VideoS2\\_FigA2.avi](#)
- [VideoS3\\_FigA4.avi](#)

The copyright of individual parts of the supplement might differ from the article licence.
